# Supplementary material for: Serum Antibody Binding and Cytotoxicity to Pig Cells in Chinese Subjects: Relevance to Clinical Renal Xenotransplantation
Source: Frontiers journal article supplement (doi:10.3389/fimmu.2022.844632), 2022-03-10
Supplement: Data_Sheet_1.PDF [file Data_Sheet_1.PDF]

Supplemental Figure 1

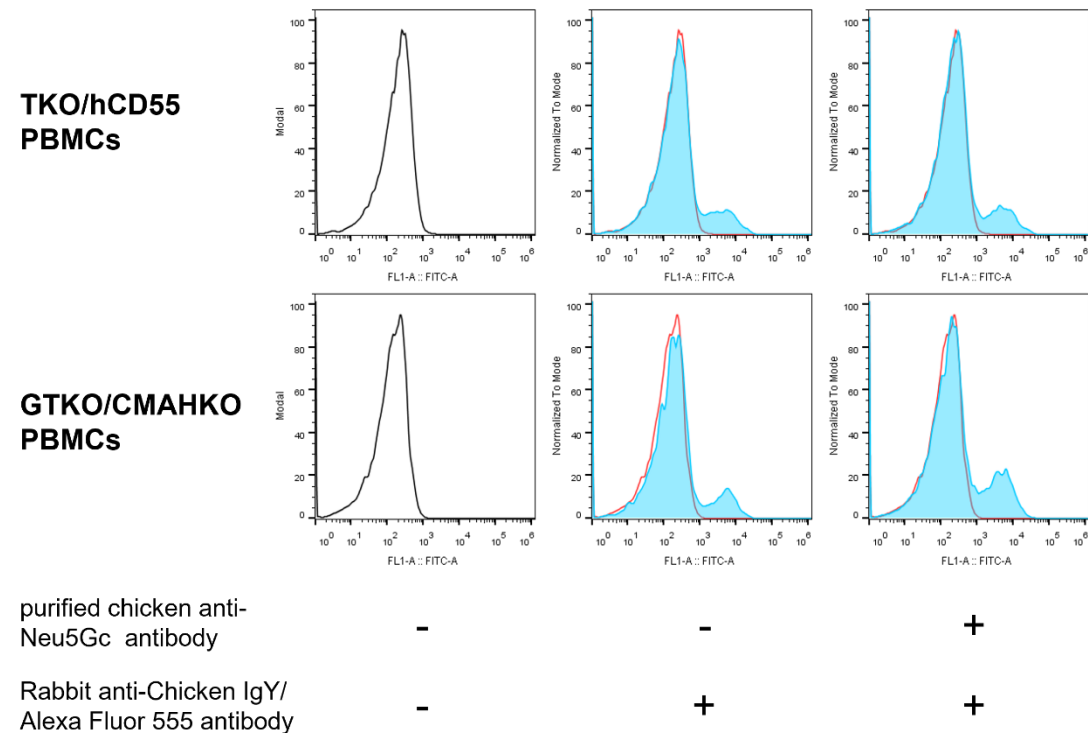

**Supplementary Figure 1: The false positive expression of Neu5Gc on pig PBMCs was caused by Rabbit anti-Chicken IgY/Alexa Fluor 555 antibody.** Blank histograms represent negative controls that were unstained cells (**Left**). Pig PBMC was only stained with Rabbit anti-Chicken IgY/Alexa Fluor 555 antibody (**Middle**). Pig PBMC was stained with purified chicken anti-Neu5Gc antibody and then stained with Rabbit anti-Chicken IgY/Alexa Fluor 555 antibody (**Right**).
